# Supplementary material
Source: PubMed Central journal article supplement (PMC3779702)

**Sup Table 1** List of primers and vectors used in this study

| primer                  | sequence                                                  | direction | site    | use                                                                       | plasmid        | linearisation | strain   |
|-------------------------|-----------------------------------------------------------|-----------|---------|---------------------------------------------------------------------------|----------------|---------------|----------|
| <b><i>T. gondii</i></b> |                                                           |           |         |                                                                           |                |               |          |
| ASH1ann-s               | GGAAATCCTCTCCCCCGAG                                       | sense     | -       | annotation of TgASH1                                                      | -              | -             | -        |
| ASH1ann-a               | CCTCGCTCTCTCTCGCTCGCTCGG                                  | antisense | -       |                                                                           |                |               |          |
| ASH1-s                  | GAATTCCTGGAGGAAATTCACACATGCCGC                            | sense     | EcoRI   | overexpression of Tub8 promoter controlled second copy with C-term Ty tag | pT8-ASH1Ty-HX  | BamHI         | ASH1-Ty  |
| ASH1-a                  | ATGCATCGTTTGTGTGAGGACGTTTCGATGAATCGTCG                    | antisense | Nsil    |                                                                           |                |               |          |
| ASH1-KI-s               | CCGGGTACCGCGGGTGGGCCACCTCG                                | sense     | KpnI    | C-term epitope tagging of endogenous gene                                 | ASH1-3Ty-KI-HX | AvrII         | ASH1-3Ty |
| ASH1-KI-a               | CCATGCATGTTTGTGTGAGGACGTTTCGATG                           | antisense | Nsil    |                                                                           |                |               |          |
| ASH1-KO-s               | CCGTTAATTAATCCATATTATGTCTAGATGGGAATCTGG                   | sense     | Pacl    | Knock-out of endogenous gene -5'UTR fragment cloned into ASH1-3Ty-KI-HX   | ASH1-KO-HX     | Pacl          | ash1-ko  |
| ASH1KO-a                | CCGGTTAACGTGCGGTGCACAGCAGCCAGC                            | antisense | Hpal    |                                                                           |                |               |          |
| ASH1KO-c (P1)           | CATATGCCGCCCTTGCTCTTGAAGTTTC                              | sense     | NdeI    | confirmation of ASH1KO - WT locus                                         | -              | -             | -        |
| ASH1KO-c (P2)           | AAGCTTTGCATCGTTTGTGTGAGGACGTTTTTC                         | antisense | HindIII |                                                                           |                |               |          |
| ASH1KO-c (P3)           | TAATACGACTCACTATAGGG                                      | sense     | -       | confirmation of ASH1KO - 3' integration                                   | -              | -             | -        |
| ASH1KO-c (P4)           | CCTCGCTCTCTCTCGCTCGCTCGG                                  | antisense | -       |                                                                           |                |               |          |
| ASH1KO-c (P5)           | GGAGCGGCCGCGGGGTGGGCCACCTCG                               | sense     | NotI    | control                                                                   | -              | -             | -        |
| ASH2-KI-s               | TACTTCCAATCCAATTTAATGCCAATCTTTTGTCTGAGC                   | sense     | KpnI    | C-term epitope tagging of endogenous gene                                 | ASH2-3Ty-KI-HX | SnaBI         | ASH2-3Ty |
| ASH2-KI-a               | TCCTCCACTTCCAATTTTAGCAAATGCATTTTCAGACCTTCTTCGCAAGTCG      | antisense | Nsil    |                                                                           |                |               |          |
| ASH2-KO-s               | TACTTCCAATCCAATTTAATGCCAATCTTTTGTCTGAGC                   | sense     | KpnI    | Endogenous gene truncation                                                | ASH2-3Ty-KO-HX | EcoRI         | ash2-ko  |
| ASH2-KO-a               | TCCTCCACTTCCAATTTTAGCAAATGCATTTCTGGTGAGGTCTCTGCACCG       | antisense | Nsil    |                                                                           |                |               |          |
| ASH2KO-c (P1)           | TACTTCCAATCCAATTTAATGCCAATCTTTTGTCTGAGC                   | sense     | KpnI    | control                                                                   | -              | -             | -        |
| ASH2KO-c (P2)           | TCCTCCACTTCCAATTTTAGCAAATGCATTTCTGGTGAGGTCTCTGCACCG       | antisense | Nsil    |                                                                           |                |               |          |
| ASH2KO-c (P3)           | GTGACACCTGCAAGCCACAGCGG                                   | antisense | -       | Integration 5'                                                            | -              | -             | -        |
| ASH2KO-c (P4)           | CCCAACGTTTCAGAGCTATGCAGCTCTAGG                            | sense     | -       | WT locus/recombinant locus                                                | -              | -             | -        |
| ASH2KO-c (P5)           | ATGCATCTTCAGACCTTCTTCGCAAGTCGCATC                         | antisense | Nsil    | WT locus                                                                  | -              | -             | -        |
| ASH3-KI-s               | TACTTCCAATCCAATTTAATGGTACCAAGAAAGCGGTGCAGGTGGG            | sense     | KpnI    | C-term epitope tagging of endogenous gene                                 | ASH3-3Ty-KI-HX | StuI          | ASH3-3Ty |
| ASH3-KI-a               | TCCTCCACTTCCAATTTTAGCAAATGCATGACCCCATGGCAATTCGACG         | antisense | Nsil    |                                                                           |                |               |          |
| ASH3-KO-s               | TACTTCCAATCCAATTTAATGGTACCAAGAAAGCGGTGCAGGTGGG            | sense     | KpnI    | Endogenous gene truncation                                                | ASH3-3Ty-KO-HX | StuI          | ash3-ko  |
| ASH3-KO-a               | TCCTCCACTTCCAATTTTAGCAAATGCATGGGCATTTCAGTGCCTCTCTCTC      | antisense | Nsil    |                                                                           |                |               |          |
| ASH3KO-c (P1)           | TACTTCCAATCCAATTTAATGGTACCAAGAAAGCGGTGCAGGTGGG            | sense     | KpnI    | control                                                                   | -              | -             | -        |
| ASH3KO-c (P2)           | TCCTCCACTTCCAATTTTAGCAAATGCATGGGCATTTCAGTGCCTCTCTCTC      | antisense | Nsil    |                                                                           |                |               |          |
| ASH3KO-c (P3)           | GTGACACCTGCAAGCCACAGCGG                                   | antisense | -       | Integration 5'                                                            | -              | -             | -        |
| ASH3KO-c (P4)           | CGTACGGGGTTGCCGAGGCTTG                                    | sense     | -       | WT locus/recombinant locus                                                | -              | -             | -        |
| ASH3KO-c (P5)           | CAATCGTATCTGTGCTTCTCACC                                   | antisense | -       | WT locus                                                                  | -              | -             | -        |
| ASH4-KI-s               | TACTTCCAATCCAATTTAATGCGGGAAGCGTGCAGAGCAGGGAGTGATG         | sense     | KpnI    | C-term epitope tagging of endogenous gene                                 | ASH4-3Ty-KI-HX | NcoI          | ASH4-3Ty |
| ASH4-KI-a               | TCCTCCACTTCCAATTTTAGCAAATGCAGTTCTGACGAGACGCGCGTGGAACTGAGG | antisense | PstI    |                                                                           |                |               |          |
| ASH4-KO-s               | TACTTCCAATCCAATTTAATGCTCACCATCATCTTCAGTCACGGAAATG         | sense     | KpnI    | Endogenous gene truncation                                                | ASH4-3Ty-KO-HX | SnaBI         | -        |
| ASH4-KO-a               | TCCTCCACTTCCAATTTTAGCAAATGCATTTGCCCATATCTGGAAAGATCAAACG   | antisense | Nsil    |                                                                           |                |               |          |
| ASH4KO-c (P1)           | TACTTCCAATCCAATTTAATGCTCACCATCATCTTCAGTCACGGAAATG         | sense     | KpnI    | control                                                                   | -              | -             | -        |
| ASH4KO-c (P2)           | TCCTCCACTTCCAATTTTAGCAAATGCATTTGCCCATATCTGGAAAGATCAAACG   | antisense | Nsil    |                                                                           |                |               |          |
| ASH4KO-c (P3)           | GTGACACCTGCAAGCCACAGCGG                                   | antisense | -       | Integration 5'                                                            | -              | -             | -        |
| ASH4KO-c (P4)           | GGATCCATGGGAAACGCTCTGAAAGCGGATG                           | sense     | BamHI   | WT locus/recombinant locus                                                | -              | -             | -        |
| ASH4KO-c (P5)           | GCGGCCGCTCATCTGACGAGACGCGCCG                              | antisense | NotI    | WT locus                                                                  | -              | -             | -        |
| <b><i>E. coli</i></b>   |                                                           |           |         |                                                                           |                |               |          |
| rASH1-His-s             | GGATCCATGGCGTCTCTCCAGCCAGGCGACGGCTA                       | sense     | BamHI   | producing recombinant ASH1 with 8-His N-term tag                          | His-rASH1      | -             | -        |
| rASH1-His-a             | CTCGAGTCAGTTTGTGTGAGGACGTTTCGATGAATC                      | antisense | XhoI    |                                                                           |                |               |          |

**FIGURE S1 - A** - Mass spectrometry spectra of identified inhibitor targets. Parasite lysates treated first with the inhibitors, then with FP-Rh probe were run on a gel next to active serine hydrolases purified using biotinylated FP (FP-biotin). Bands were cut at appropriate positions for inhibitor targets (as identified by the disappearance of a band in the lysate lanes compared to the RH control) and analysed by mass spectrometry

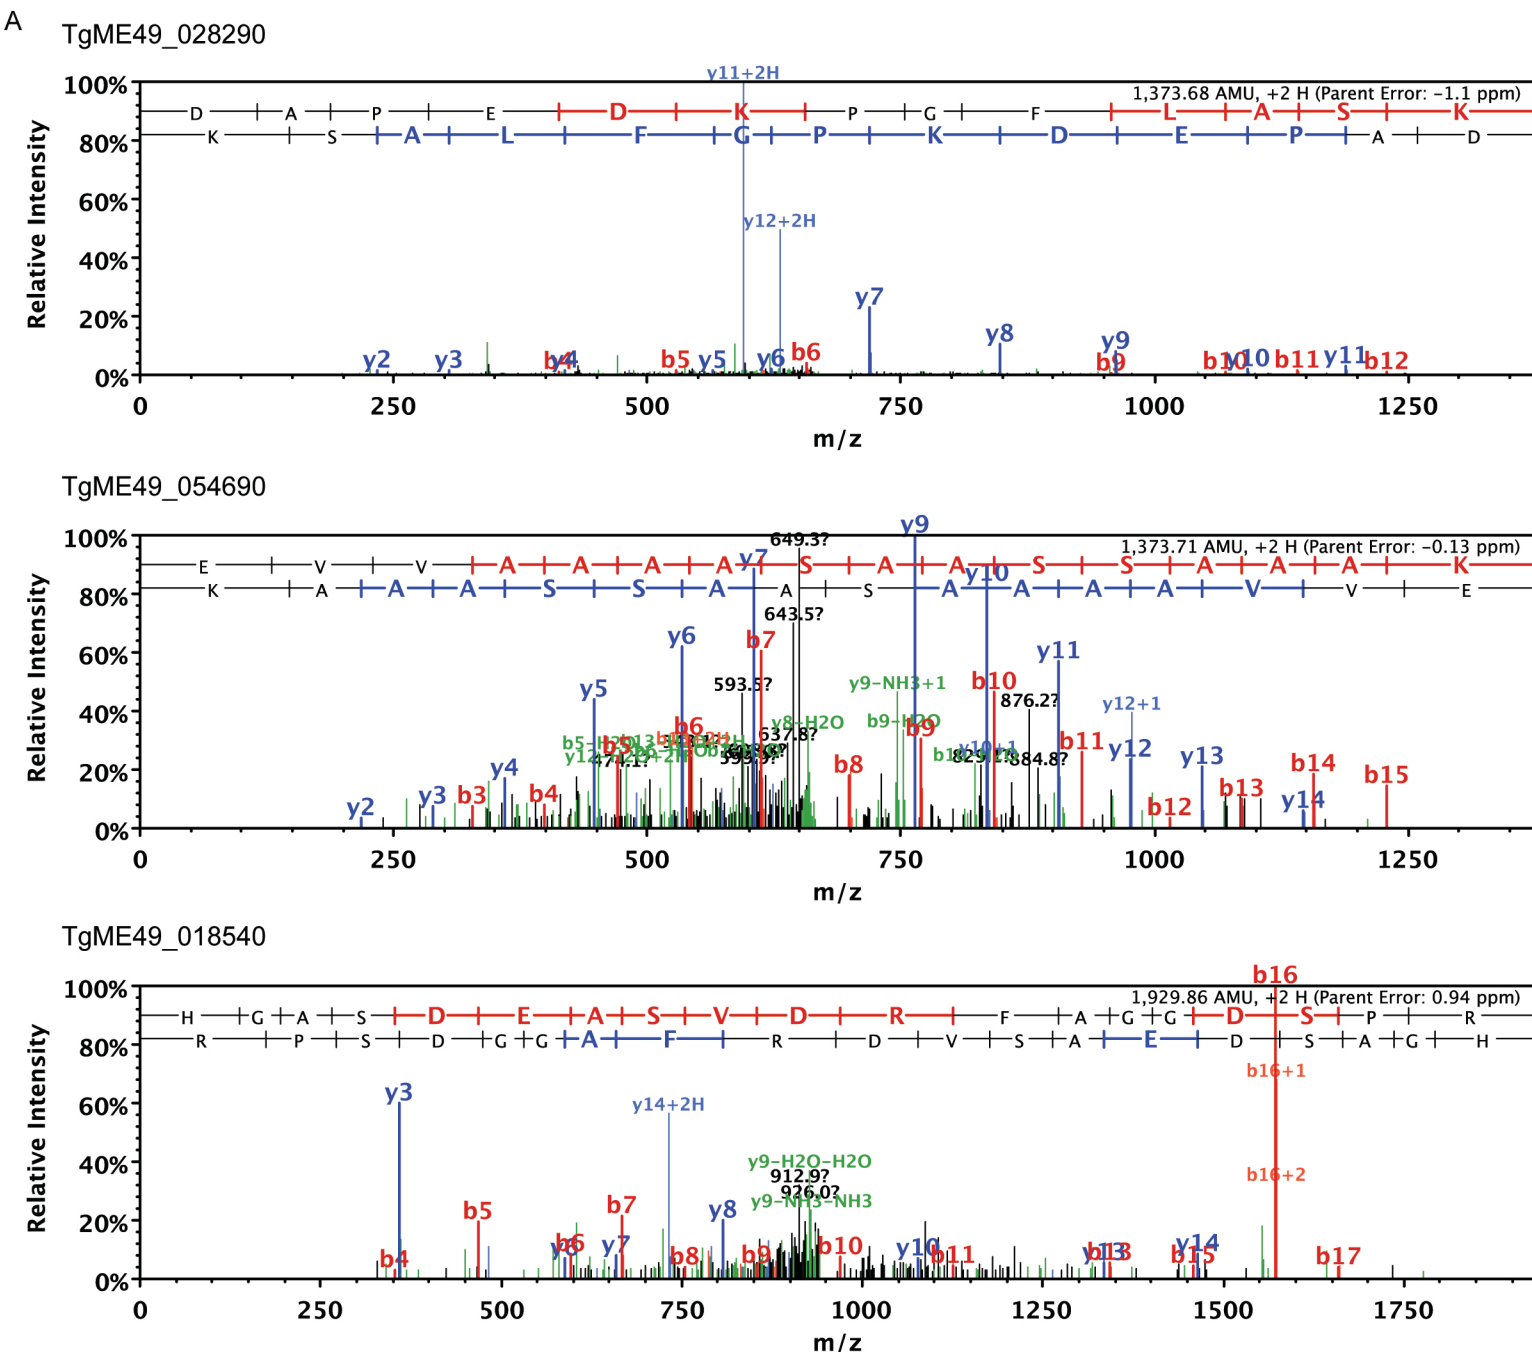

**Figure S2- A-** Alignment of APT1 homologues and alternative candidates across multiple species. **B-** Alignment of human APT1 with related coccidian proteins using ClustalOmega (EMBL-EBI). For the identity of the genes and organisms, see legend for Fig. 4.

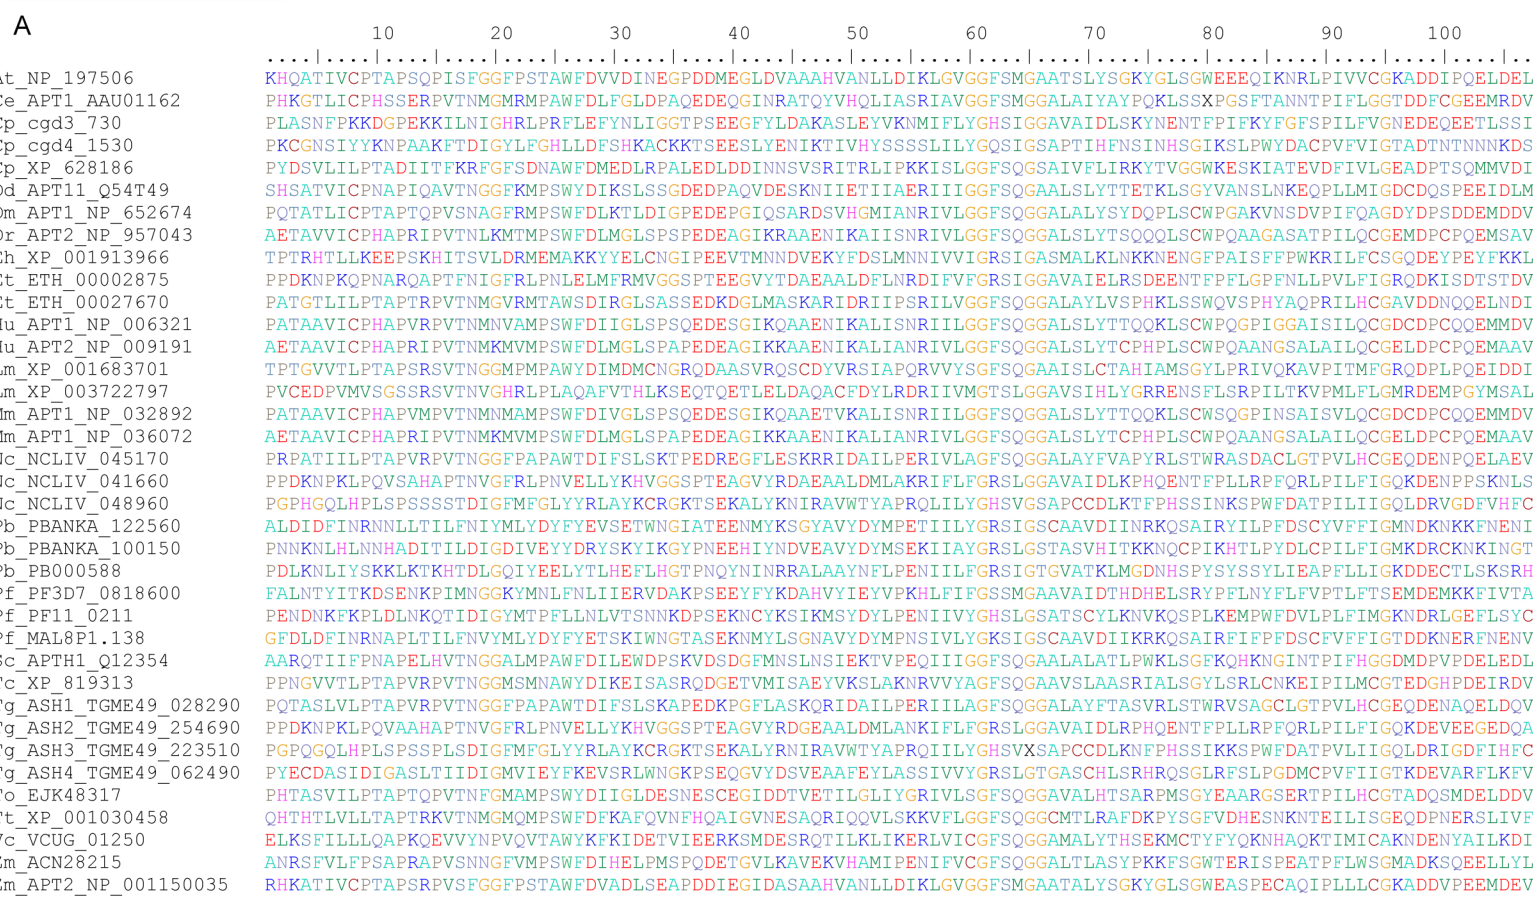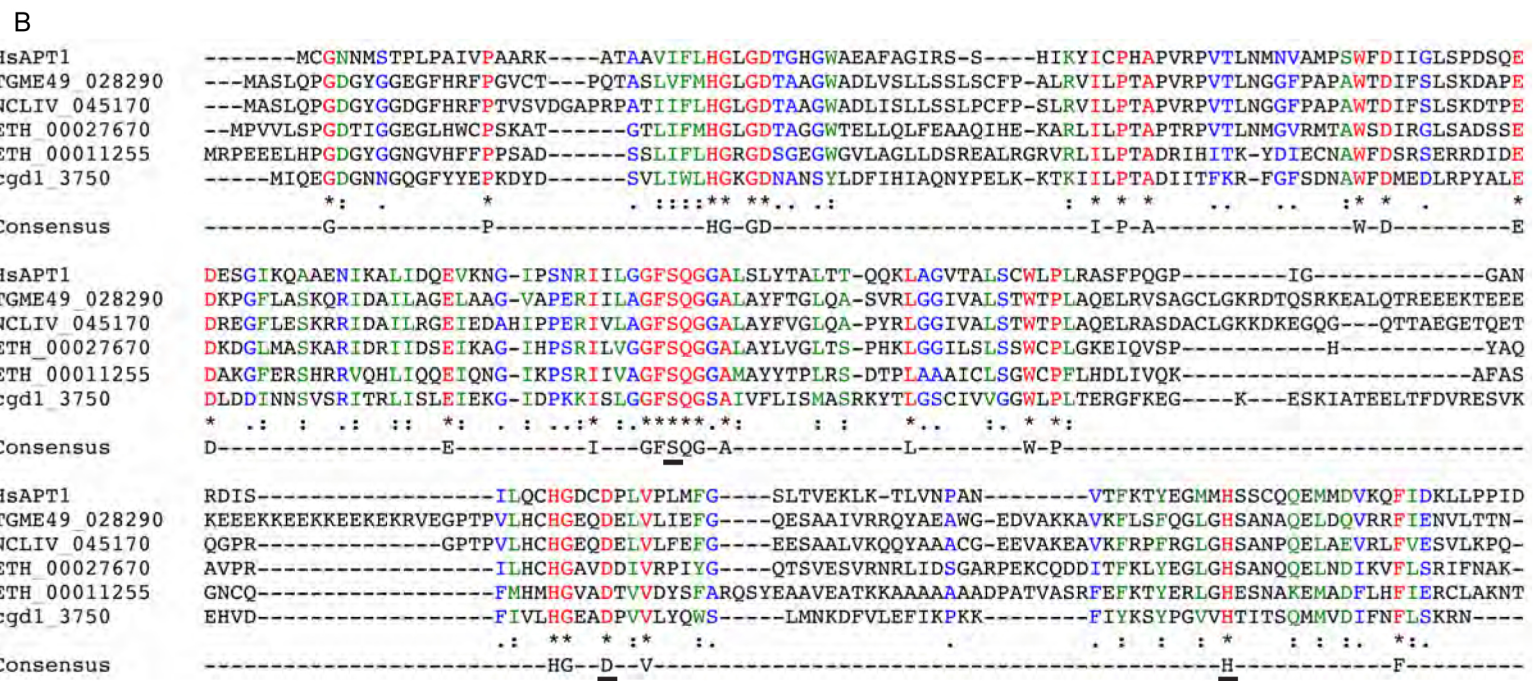

Supplement: supp_M113.460709_SupFigs_LKemp-JBC_manuscript_6167.pdf [file supp_M113.460709_SupFigs_LKemp-JBC_manuscript_6167.pdf]
